# Supplementary material for: Phthalate Exposure Enhances Incidence of Urinary Incontinence: US NHANES, 2003-2004 and 2005-2006
Source: Research Square preprint supplement (doi:10.21203/rs.3.rs-811494/v1), 2021-09-02
Supplement: Supplementary file 1 [file 749c3b42e2aa21d4ac8e3eaf.docx]

| Log-transformed | Unadjusted | | Model 1c | | Model 2d | |
| --- | --- | --- | --- | --- | --- | --- |
| ORa of Urinary Incontinence (95% CI b) | P | ORa of Urinary Incontinence (95% CI b) | P | ORa of Urinary Incontinence (95% CI b) | P |
| **MCNP** | 1.11 (1.02, 1.20) | 0.011 | 1.07 (0.98, 1.16) | 0.130 | 1.07 (0.98, 1.17) | 0.122 |
| **MCOP** | 1.07 (0.99, 1.14) | 0.073 | 1.06 (0.99, 1.14) | 0.097 | 1.08 (1.00, 1.16) | 0.056 |
| **MiBP** | 1.11 (1.02, 1.20) | 0.019 | 1.12 (1.02, 1.22) | 0.013 | 1.10 (1.01, 1.21) | 0.030 |
| **MEP** | 1.01 (0.96, 1.06) | 0.761 | 1.02 (0.9618, 1.08) | 0.530 | 1.02 (0.96, 1.08) | 0.502 |
| **MBP** | 1.12 (1.03, 1.21) | 0.007 | 1.12 (1.03, 1.22) | 0.010 | 1.12 (1.03, 1.22) | 0.012 |
| **MCPP** | 1.20 (1.10, 1.32) | <0.001 | 1.17 (1.06, 1.29) | 0.002 | 1.17 (1.06, 1.29) | 0.002 |
| **DEHP** | 1.03 (0.95, 1.10) | 0.480 | 1.04 (0.96, 1.13) | 0.325 | 1.05 (0.97, 1.13) | 0.268 |

Supplement Table 1 Association between exposure to phthalate and UI among US adults.

a OR: odds ratio

b CI: confidence intervals

c adjusted for age, race/ethnicity, BMI, ratio of family income to poverty, education level, and comorbidity index

b adjusted for age, race/ethnicity, BMI, ratio of family income to poverty, education level, comorbidity index, marital status, physical activity, and smoking status
